# Supplementary material for: Palmitate induces DNA damage and senescence in human adipocytes in vitro that can be alleviated by oleic acid but not inorganic nitrate
Source: PubMed Central journal article supplement (PMC9214712; doi:10.1016/j.exger.2022.111798), 2022-04-04
Supplement: NIHMS1814755-supplement-supplementary.pdf [file NIHMS1814755-supplement-supplementary.pdf]

The following are the supplementary data related to this article.

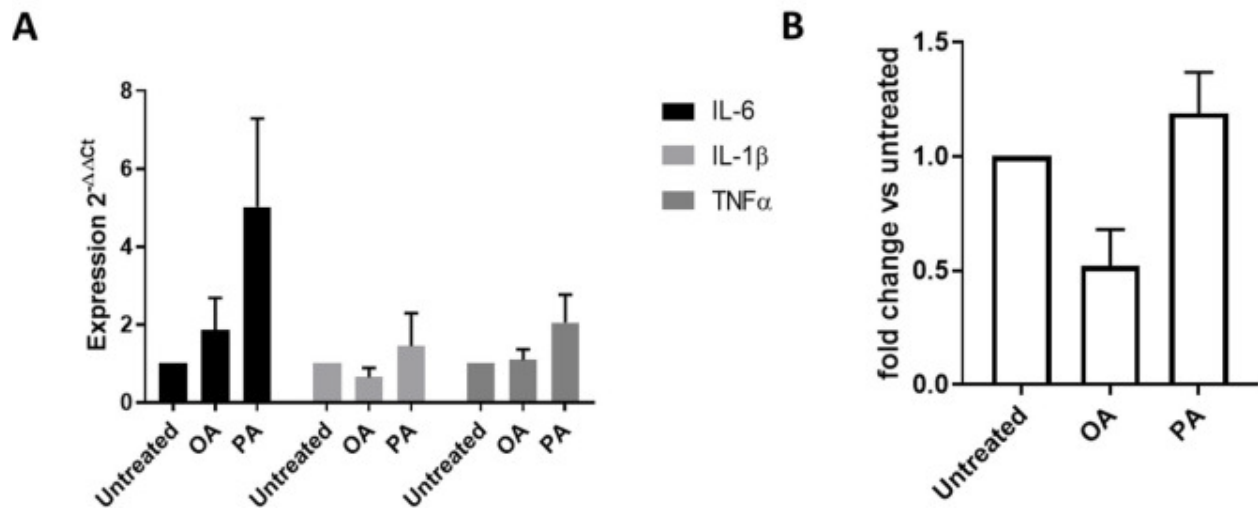

1. [Download : Download high-res image \(139KB\)](#)
2. [Download : Download full-size image](#)

Supplementary Fig. 1. Effect of 4 days 150 nM FFA treatment on senescence and inflammation markers as well as ROS levels in human primary subcutaneous adipocytes (Lonza). *p16<sup>INK4a</sup>* and *p21<sup>CIP1</sup>* and B) the inflammation markers, *IL-6*, *IL-1β*, and *TNFα*. C) Mitochondrial superoxide measurement by flow cytometry using a mitosox probe; n = 4 independent experiments.

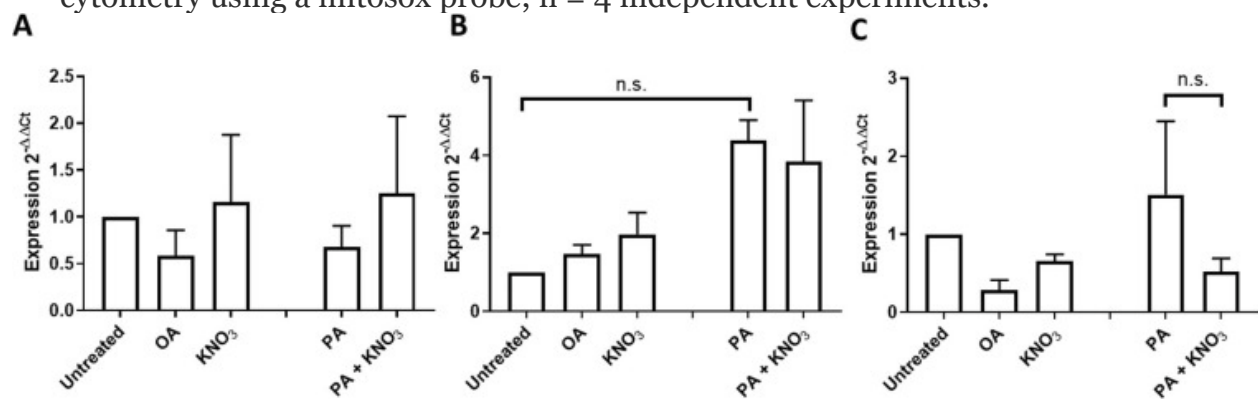

1. [Download : Download high-res image \(150KB\)](#)
2. [Download : Download full-size image](#)

Supplementary Fig. 2. Effect of 2 days treatment with 100 μM nitrate on beiging markers “after differentiation” treatment of human subcutaneous adipocytes (Lonza). Expression of beiging markers A) *UCP1*, B) *CPT1a*, and C) *PGC-1α*.
